# Supplementary material for: Notch1 signaling in NOTCH1-mutated mantle cell lymphoma depends on Delta-Like ligand 4 and is a potential target for specific antibody therapy
Source: PubMed Central journal article supplement (PMC6825347; doi:10.1186/s13046-019-1458-7), 2019-11-01
Supplement: 13046_2019_1458_MOESM4_ESM.pdf [file 13046_2019_1458_MOESM4_ESM.pdf]

**Additional file 4: Table S4:** Modulated gene sets upon treatment with OMP-52M51 of DLL4-stimulated Mino cells using a customized set of genes (Custom MCL)

| <b>Custom gene set name</b> | <b># Genes in Overlap (k)</b> | <b># Genes in Gene Set (K)</b> | <b>k/K</b> | <b>p-value</b> | <b>FDR q-value</b> |
|-----------------------------|-------------------------------|--------------------------------|------------|----------------|--------------------|
| Cytokine signaling          | 241                           | 309                            | 0.780      | <0.001         | <0.001             |
| Migration and Adhesion      | 176                           | 217                            | 0.811      | <0.001         | <0.001             |
| Cell Cycle                  | 241                           | 353                            | 0.683      | <0.001         | <0.001             |
| Apoptosis                   | 92                            | 147                            | 0.626      | <0.001         | <0.001             |
| DNA repair                  | 120                           | 164                            | 0.732      | <0.001         | <0.001             |
| NOTCH targets               | 51                            | 79                             | 0.646      | <0.001         | <0.001             |
| NOTCH custom                | 110                           | 154                            | 0.714      | <0.001         | <0.001             |
| DNA damage                  | 144                           | 175                            | 0.823      | <0.001         | <0.001             |
| p53 signaling               | 85                            | 105                            | 0.810      | <0.001         | <0.001             |
| Leukocyte proliferation     | 50                            | 92                             | 0.543      | <0.001         | <0.001             |
| p38MAPK signaling           | 48                            | 84                             | 0.571      | <0.001         | <0.001             |
| Angiogenesis                | 38                            | 54                             | 0.704      | <0.001         | <0.001             |
| MTOR                        | 11                            | 17                             | 0.647      | 0.032          | 0.054              |
